# Supplementary material for: The Effect of Exogenous Nitrate on LCO Signalling, Cytokinin Accumulation, and Nodule Initiation in Medicago truncatula
Source: MDPI journal article supplement (doi:10.3390/genes12070988), 2021-06-28
Supplement: s1 [file s1]

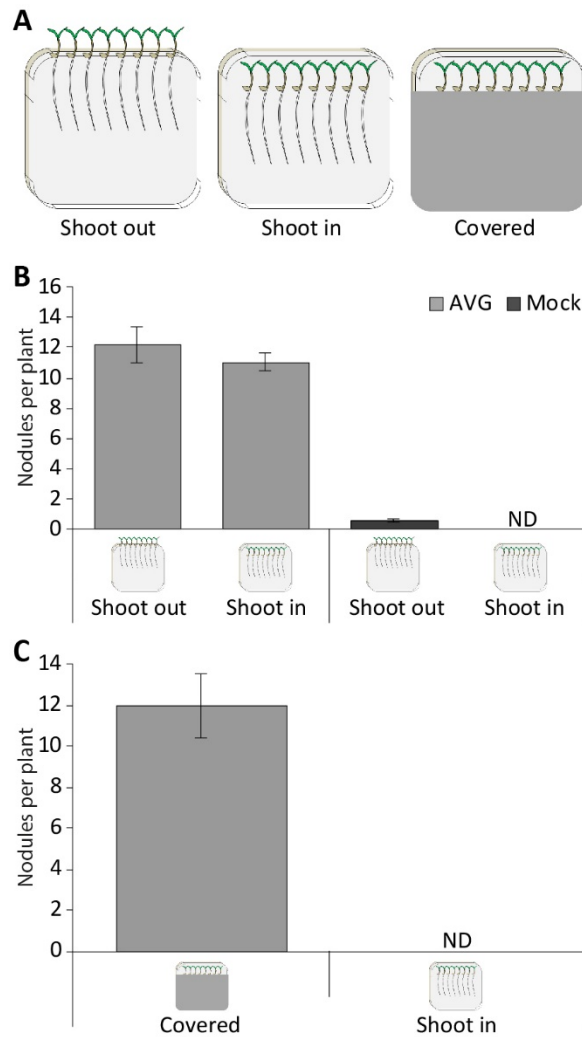

**Supplemental Figure S1.** Setting up an AVG-independent plate system for *Medicago truncatula* nodulation. **(A)** Schematic representation of three tested inoculation systems; “Shoots out” of the plate, “Shoots in” the plate and shoots in the plate with roots “Covered” by aluminum foil. **(B)** Effect of the “Shoots out” and “Shoots in” system on nodulation on plates. AVG used as a positive control. **(C)** Effect of root covering on nodulation on plates **(B-C)** 14 Days Past Inoculation, bars represent means  $\pm$  SE (n=40).

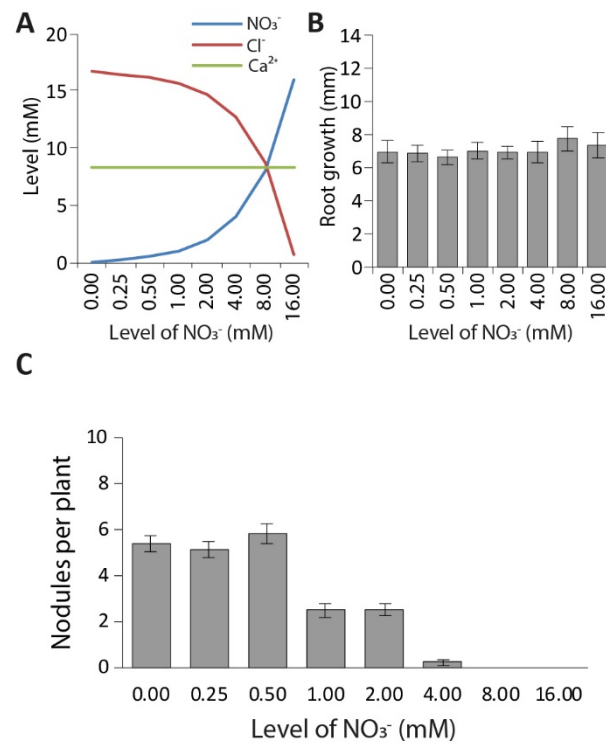

**Supplemental Figure S2:** Nitrate inhibition of nodulation on Fåhræus plates. **(A)** Schematic representation of the increase in nitrate levels. **(B)** Effect of increasing levels of nitrate on primary root growth 5 DPG (days post Germination). **(C)** Effect of nitrate on nodulation on plates at 14 DPI. Bars represent means  $\pm$  SE (n=40).

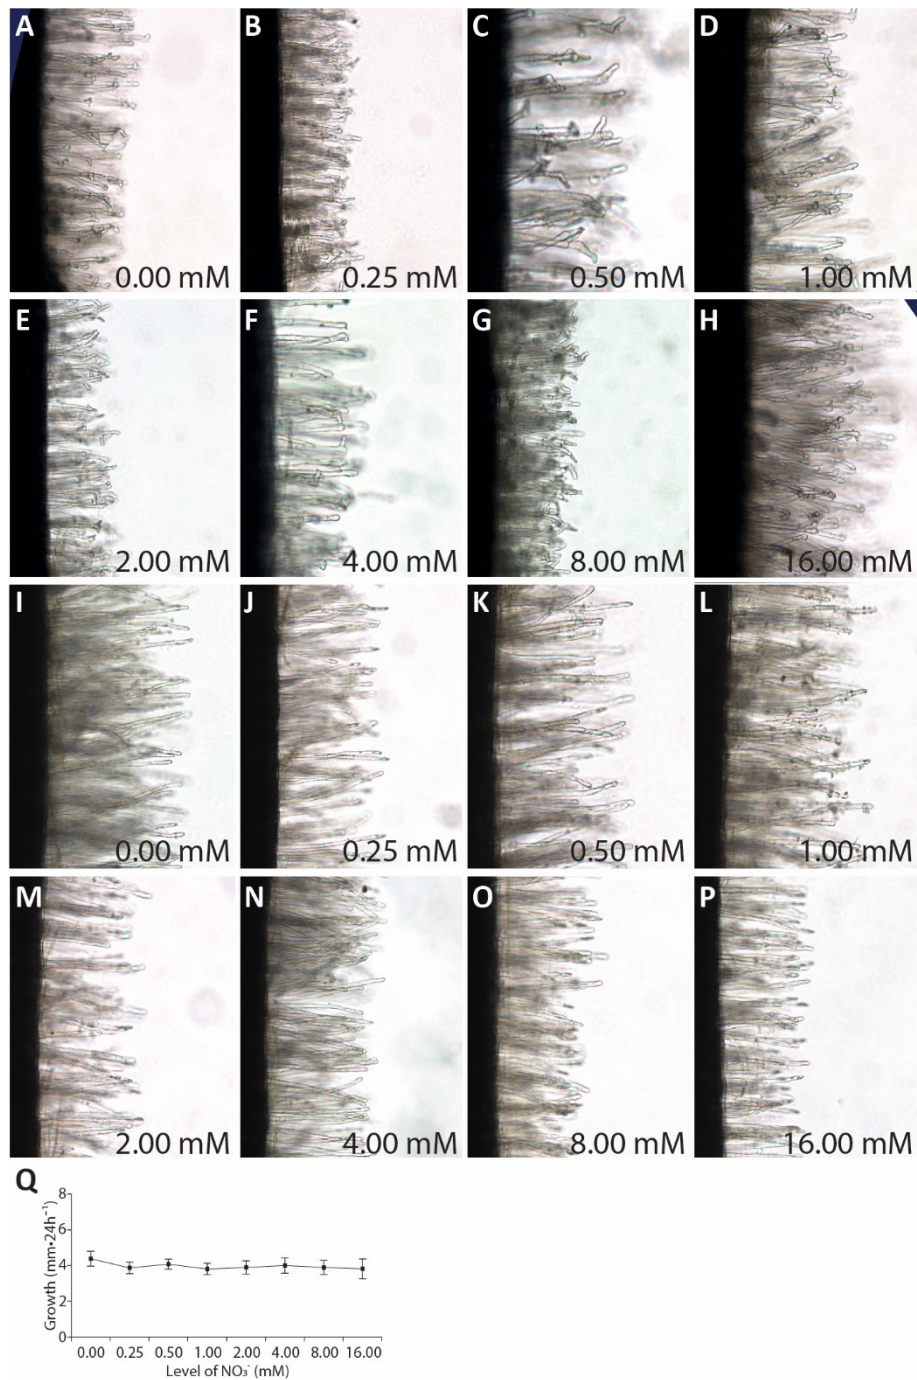

**Supplemental Figure S3.** Root hair deformation is not affected by elevated levels of nitrate. **(A-H)** LCO-induced root hair deformation at increasing levels of nitrate **(I-P)** Mock-treated roots at increasing levels of nitrate, these pictures are representative of 10 biological replicates divided over two independent experiments. **(Q)** the effect of increased nitrate on primary root growth 2 DAG (days after germination). Bars represent means  $\pm$  SE (n=10).

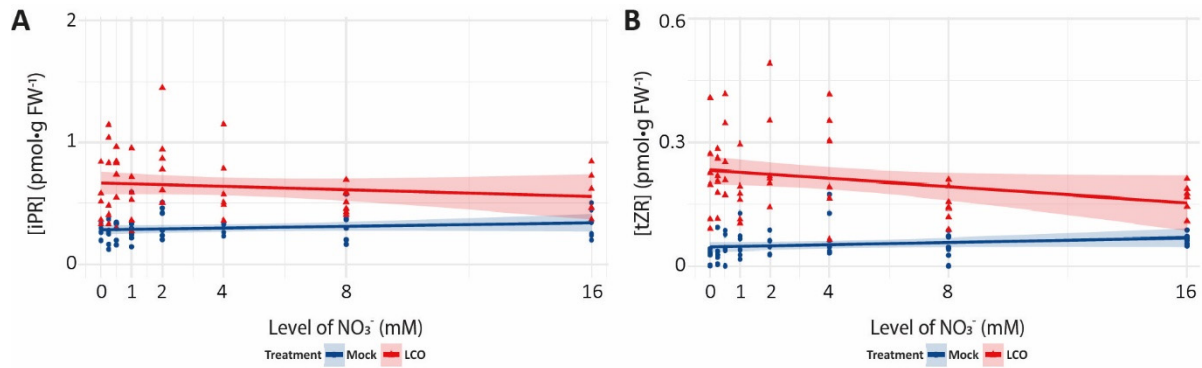

**Supplemental Figure S4:** The effect of increasing levels of nitrate on iPR and tZR accumulation in the *Medicago* root susceptible zone. Concentrations of **(A)** iPR, **(B)** tZR, were measured per gram fresh weight using UPLC-MS/MS ( $n=6$ ) in samples taken from the root susceptible zone and treated with mock or LCO for 3 h.

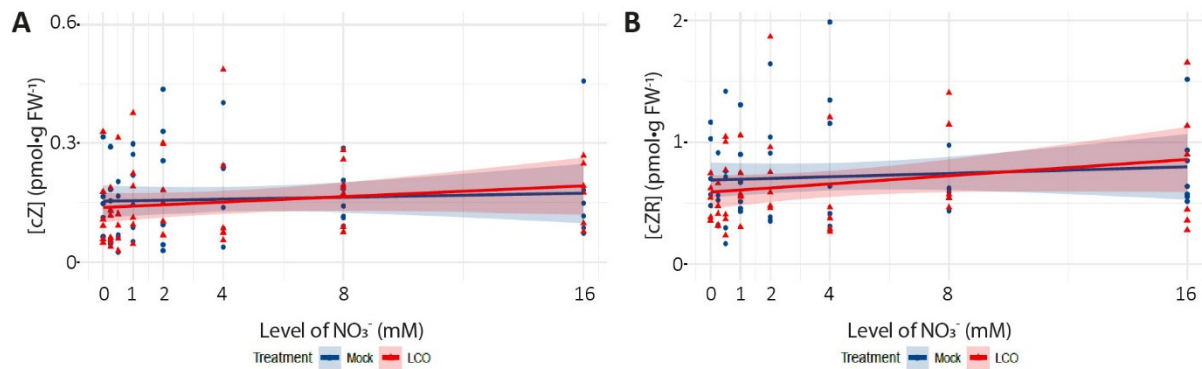

**Supplemental Figure S5:** The effect of increasing levels of nitrate on cZ and cZR accumulation in the *Medicago* root susceptible zone. Concentrations of **(A)** cZ, **(B)** cZR, were measured per gram fresh weight using UPLC-MS/MS ( $n=6$ , ) in samples taken from the root susceptible zone and treated with mock or LCO for 3 h.

**Supplemental Table S1.** Sequences and primers used in this study (*M. truncatula* genome v4.01)

| Primer name | Sequence                 | Gene ID       |
|-------------|--------------------------|---------------|
| MtACD_Fw    | AAACAAAGTGC GGAAATTGG    | Medtr8g107670 |
| MtACD_Rv    | GGGATCTTGGTCAACGAGAA     |               |
| MtNIN_Fw    | GGGAGAAAGTCCGGGGACAA     | Medtr5g099060 |
| MtNIN_Rv    | GACACACACCGATGCTCTTTGC   |               |
| MtACT_Fw    | GCAAAGGCAGAATATGATGAAT   | Medtr2g008050 |
| MtACT_Rv    | CCACTATGACTGCCAGAACACTTA |               |
| MtPTB_Fw    | TGAACCAGTGCCTGGAATCCT    | Medtr3g090960 |
| MtPTB_Rv    | CGCCTTGTCAGCATTGATGTC    |               |
| MtUBQ_Fw    | CACCTCCAATGTAATGGTCTTTCC | Medtr4g091580 |
| MtUBQ_Rv    | CCCTTCATCTTGTCCTTCGTCTG  |               |

**Supplemental Table S2.** Multiple reactions monitoring (MRM) transitions table. Transitions for all cytokinins and corresponding internal standards used in this study.

| Number | Compound | Retention Time | Mass* | MRM transition      | Cone V. | Coll. Energy |
|--------|----------|----------------|-------|---------------------|---------|--------------|
| 1      | iP       | 8.17           | 204.1 | 69.1                | 40      | 20           |
|        |          |                |       | 136.2 <sup>‡</sup>  | 40      | 10           |
| 2      | [2H2]iP  | 8.14           | 210.1 | 75.08               | 40      | 20           |
|        |          |                |       | 137.1 <sup>‡</sup>  | 40      | 10           |
| 3      | tZ       | 2.84           | 220.3 | 136.25 <sup>‡</sup> | 40      | 15           |
|        |          |                |       | 148.25              | 40      | 15           |
|        |          |                |       | 202.3               | 40      | 10           |
| 4      | [2H3]tZ  | 2.80           | 225.3 | 137.25 <sup>‡</sup> | 40      | 15           |
|        |          |                |       | 148.25              | 40      | 15           |
|        |          |                |       | 207.25              | 40      | 10           |
| 5      | cZ       | 3.34           | 220.3 | 136.25 <sup>‡</sup> | 40      | 15           |
|        |          |                |       | 148.25              | 40      | 15           |
|        |          |                |       | 202.3               | 40      | 10           |
| 6      | DHZ      | 3.12           | 222.3 | 136.25 <sup>‡</sup> | 50      | 15           |
|        |          |                |       | 148.2               | 50      | 20           |
|        |          |                |       | 204.2               | 50      | 15           |
| 7      | [2H3]DHZ | 3.08           | 222.3 | 136.25 <sup>‡</sup> | 50      | 15           |
|        |          |                |       | 149.2               | 50      | 20           |
| 8      | tZR      | 5.48           | 352.1 | 136.2 <sup>‡</sup>  | 40      | 15           |
|        |          |                |       | 148.2               | 40      | 28           |
|        |          |                |       | 220.2               | 40      | 5            |
| 9      | [2H5]tZR | 5.42           | 357.1 | 137.2 <sup>‡</sup>  | 40      | 15           |
|        |          |                |       | 148.2               | 40      | 28           |
|        |          |                |       | 225.2               | 40      | 10           |
| 10     | cZR      | 6.17           | 352.1 | 136.2 <sup>‡</sup>  | 40      | 15           |
|        |          |                |       | 148.2               | 40      | 28           |
|        |          |                |       | 220.2               | 40      | 5            |
| 11     | iPR      | 11.84          | 336.2 | 136.2 <sup>‡</sup>  | 50      | 15           |
|        |          |                |       | 148.2               | 50      | 15           |
|        |          |                |       | 204.2               | 50      | 10           |
| 12     | [2H6]iPR | 11.82          | 342.3 | 137.2 <sup>‡</sup>  | 50      | 15           |
|        |          |                |       | 148.2               | 50      | 15           |
|        |          |                |       | 210.2               | 50      | 10           |

\*Mass in positive (+) ion mode. ‡transition used for quantification

**Supplemental Table S3.** AIC scores for various GAM models of NIN expression. Row names indicate which factors were included in the model. Lower AIC score indicates better model fit.

|                  | df    | AIC     |
|------------------|-------|---------|
| <i>Intercept</i> | 2     | 536.151 |
| $NO_3^-$         | 3     | 536.461 |
| <i>LCO</i>       | 3     | 465.644 |
| $NO_3^- + LCO$   | 9.848 | 411.748 |

**Supplemental Table S4.** Linear model coefficients with 95% confidence intervals and p-values. Modeling the relationship between concentration of six different cytokinins,  $NO_3^-$  concentration and LCO application. Model specification: Cytokinin  $\sim NO_3^- + LCO + NO_3^- : LCO$ .

|                  | cZ                                           | cZR                                          | iP                                           | iPR                                          | tZ                                               | tZR                                           |
|------------------|----------------------------------------------|----------------------------------------------|----------------------------------------------|----------------------------------------------|--------------------------------------------------|-----------------------------------------------|
| $NO_3^-$         | 0.001<br>(-0.004, 0.007)<br>$p = 0.644$      | 0.007<br>(-0.014, 0.028)<br>$p = 0.529$      | -0.001<br>(-0.005, -0.002)<br>$p = 0.474$    | -0.004<br>(-0.006, 0.014)<br>$p = 0.482$     | -0.001<br>(-0.003, -0.005)<br>$p = 0.664$        | -0.001<br>(-0.002, -0.005)<br>$p = 0.422$     |
| <i>LCO</i>       | -0.016<br>(-0.068, 0.037)<br>$p = 0.555$     | -0.067<br>(-0.273, 0.138)<br>$p = 0.523$     | 0.146<br>(0.108, 0.184)<br>$p = 0.000^{***}$ | 0.380<br>(0.283, 0.477)<br>$p = 0.000^{***}$ | 0.239<br>(0.198, 0.281)<br>$p = 0.000^{***}$     | 0.187<br>(0.152, 0.221)<br>$p = 0.000^{***}$  |
| $NO_3^- : LCO$   | 0.002<br>(-0.006, 0.010)<br>$p = 0.589$      | 0.010<br>(-0.021, 0.040)<br>$p = 0.531$      | -0.005<br>(-0.010, 0.001)<br>$p = 0.124$     | -0.011<br>(-0.025, 0.004)<br>$p = 0.157$     | -0.013<br>(-0.019, -0.007)<br>$p = 0.0001^{***}$ | -0.006<br>(-0.012, 0.001)<br>$p = 0.018^{**}$ |
| <i>Intercept</i> | 0.154<br>(0.117, 0.191)<br>$p = 0.000^{***}$ | 0.689<br>(0.544, 0.834)<br>$p = 0.000^{***}$ | 0.163<br>(0.136, 0.190)<br>$p = 0.000^{***}$ | 0.286<br>(0.218, 0.355)<br>$p = 0.000^{***}$ | 0.016<br>(-0.013, 0.045)<br>$p = 0.281$          | 0.047<br>(0.022, 0.071)<br>$p = 0.0004^{***}$ |
| Observations     | 99                                           | 99                                           | 99                                           | 99                                           | 99                                               | 99                                            |

note:

\*  $p < 0.1$ ; \*\*  $p < 0.05$ ; \*\*\*  $p < 0.01$
